# Supplementary material for: Associative behavior of polyimide/cyclohexanone solutions
Source: Royal Society of Chemistry journal article supplement (doi:10.1039/c9ra05538j), 2019-01-01
Supplement: c9ra05538j1.pdf [file c9ra05538j1.pdf]

Electronic supplementary information

## **Associative behavior of polyimide/cyclohexanone solutions**

Hongxiang Chen,<sup>ab</sup> Wei Liu,<sup>a</sup> Mei Hong,<sup>ab</sup> Ensong Zhang,<sup>\*a</sup> Xuemin Dai,<sup>c</sup> Quan Chen,<sup>a</sup>  
Wenke Yang,<sup>a</sup> Yanhu Xue,<sup>a</sup> Xuepeng Qiu<sup>c</sup> and Xiangling Ji<sup>\*ab</sup>

<sup>a</sup> *State Key Laboratory of Polymer Physics and Chemistry, Changchun Institute of Applied Chemistry, Chinese Academy of Sciences, Changchun 130022, People's Republic of China. E-mail: zhangensong@fudan.edu.cn, xlji@ciac.ac.cn.*

<sup>b</sup> *University of Science and Technology of China, Hefei 230026, People's Republic of China*

<sup>c</sup> *Laboratory of Polymer Composites and Engineering, Changchun Institute of Applied Chemistry, Chinese Academy of Sciences, Changchun 130022, People's Republic of China*

\* Corresponding author Tel: +86 431 85262131, 85262876. Fax: +86 431 85262075

E-mail address: zhangensong@fudan.edu.cn, xlji@ciac.ac.cn

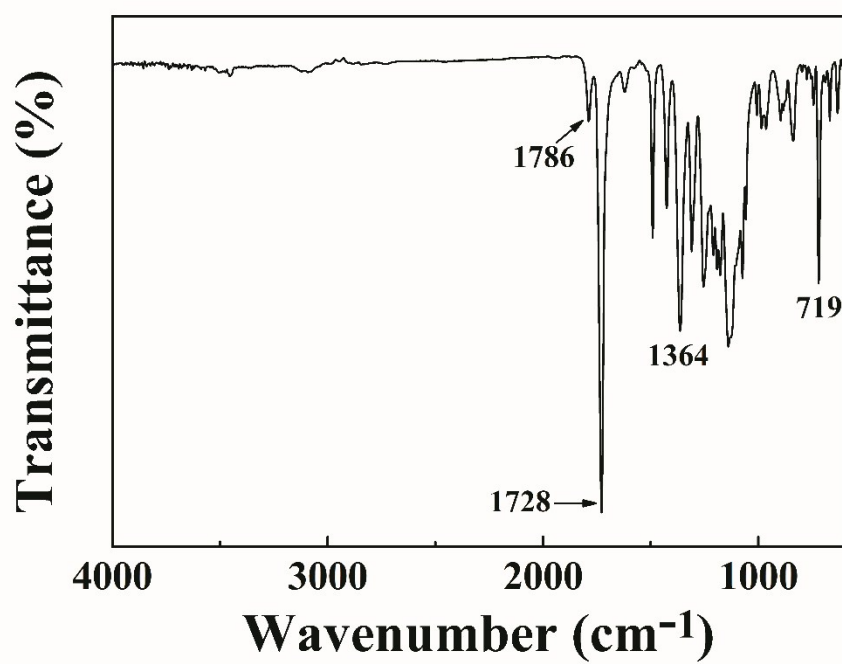

**Fig. S1** FTIR spectrum of 6FDA-TFDB PI sample.

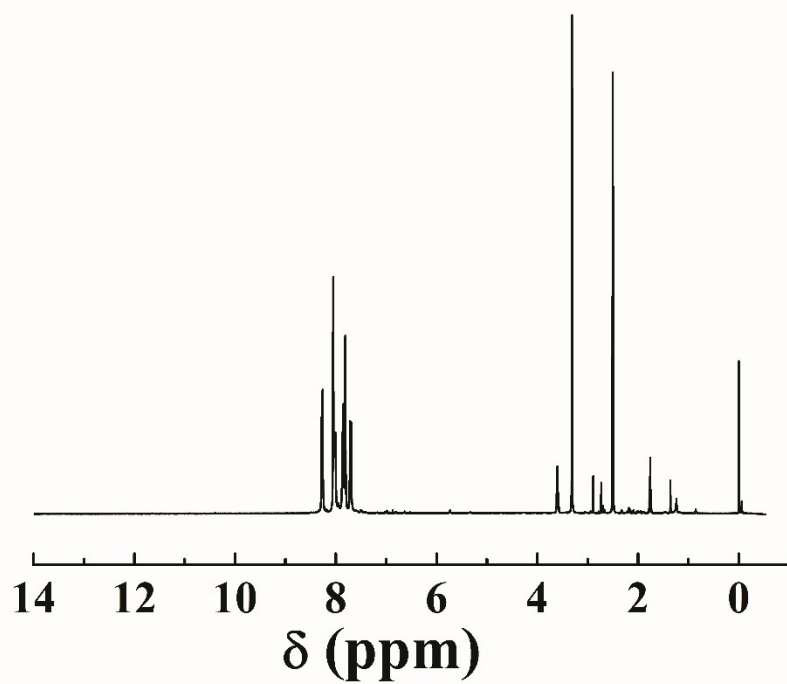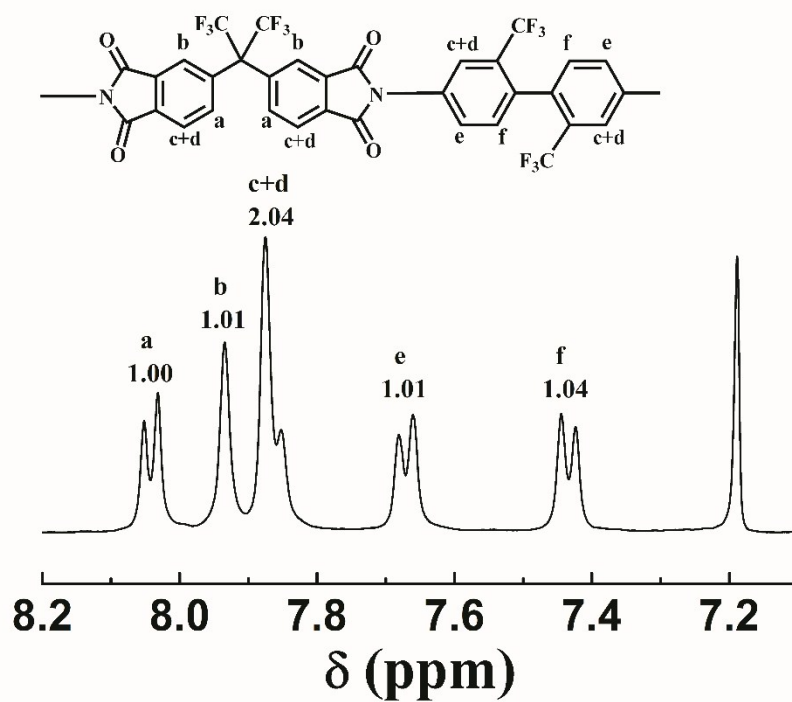

Fig. S2  $^1\text{H-NMR}$  spectra of 6FDA-TFDB PI sample.

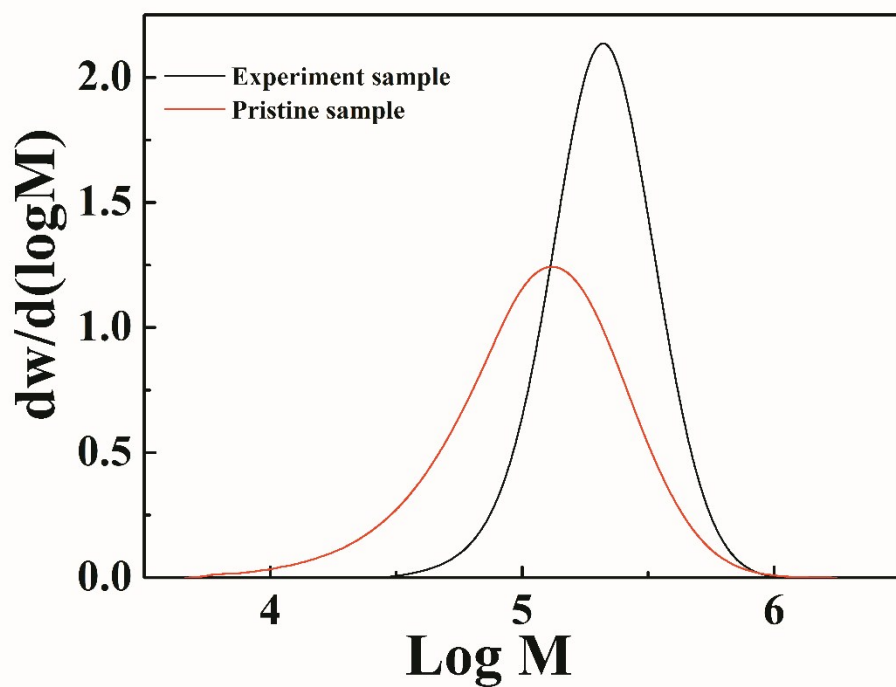

**Fig. S3** Molecular weight distribution of pristine sample and experiment sample (SEC-RI).

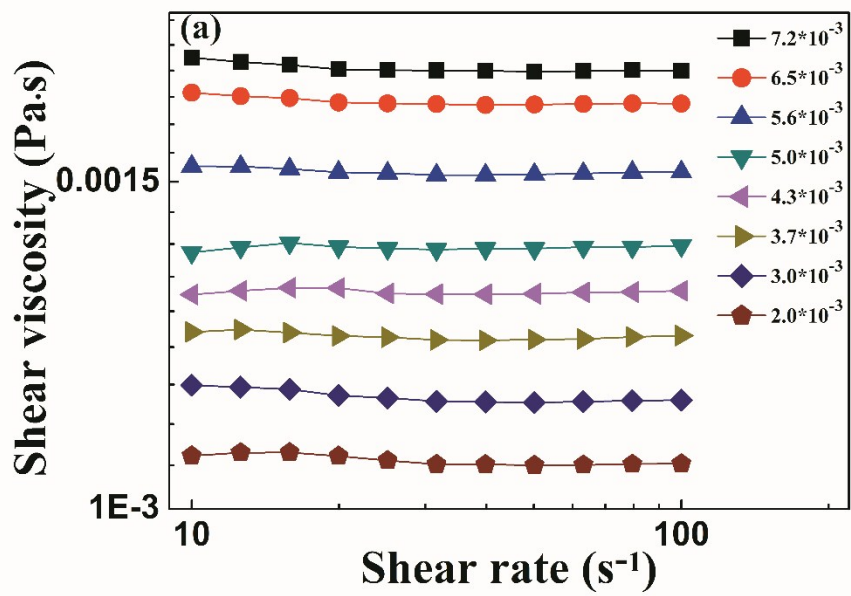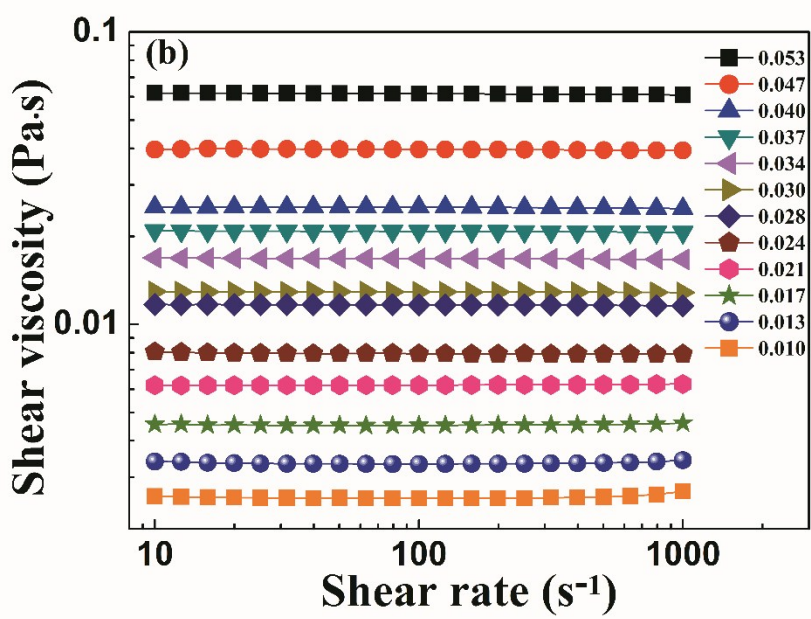

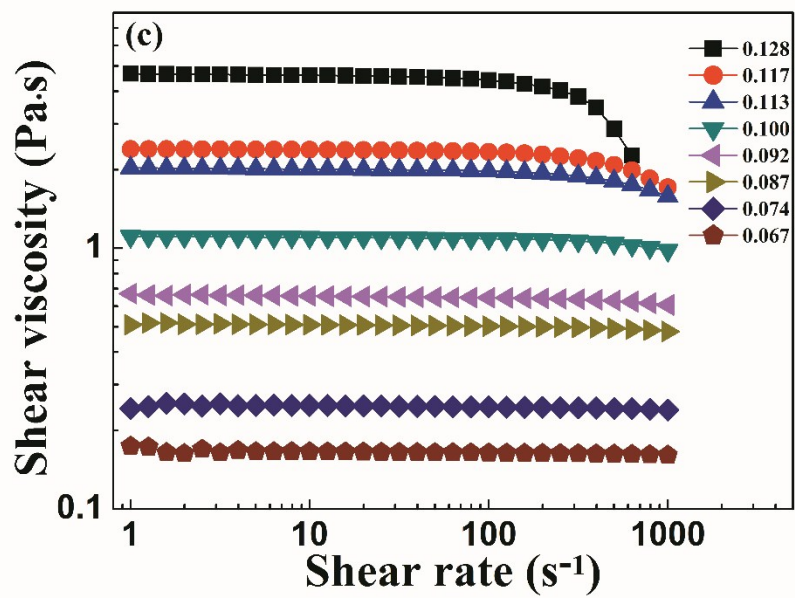

**Fig. S4** Shear viscosity against shear rate of PI/DMF solutions with different volume fractions,  $2.0 \times 10^{-3}$ – $7.2 \times 10^{-3}$  (a), 0.010–0.053 (b), 0.067–0.128 (c).
